# Supplementary material
Source: PubMed Central journal article supplement (PMC8103893)

**Table S1.** Clinicopathologic information of 2 datasets in discovery and *in silico* validation phase

| <b>Characteristics</b>      | <b>Discovery cohort<br/>(n=108)</b> | <b>Validation cohort<br/>(n=141)</b> |
|-----------------------------|-------------------------------------|--------------------------------------|
| Accession No.               | GSE15081                            | GSE62254                             |
| Technology                  | Microarray                          | Microarray                           |
| Median age in years (range) | N/A                                 | 63 (30-84)                           |
| Sex                         |                                     |                                      |
| Male                        | N/A                                 | 95 (67.4%)                           |
| Female                      | N/A                                 | 46 (32.6%)                           |
| TNM stage                   |                                     |                                      |
| 2                           | N/A                                 | 72 (51.1%)                           |
| 3                           | N/A                                 | 69 (48.9%)                           |
| Adjuvant treatment          |                                     |                                      |
| Yes                         | N/A                                 | 55 (39.0%)                           |
| No                          | N/A                                 | 85 (60.9%)                           |
| Unknown                     | N/A                                 | 1 (0.1%)                             |
| Peritoneal recurrence       |                                     |                                      |
| Yes                         | 33 (30.6)                           | 28 (19.9%)                           |
| No                          | 75 (69.4)                           | 113 (80.1%)                          |

**Table S2.** Clinicopathologic characteristics of 3 clinical cohorts

| Peritoneal recurrence                     |                            |                              | Peritoneal metastasis                     |                                                    |
|-------------------------------------------|----------------------------|------------------------------|-------------------------------------------|----------------------------------------------------|
| Tissue samples, n (%)                     |                            |                              | Tissue samples, n (%)                     |                                                    |
| Variables                                 | Training cohort<br>(n=216) | Validation cohort<br>(n=111) | Variables                                 | Peritoneal metastasis evaluation cohort<br>(n=210) |
| Median age at operation, years<br>(range) | 63 (18-83)                 | 59 (32-88)                   | Median age at operation,<br>years (range) | 60 (28-88)                                         |
| Age distribution                          |                            |                              | Age distribution                          |                                                    |
| ≤60                                       | 96 (44.4)                  | 59 (53.2)                    | ≤60                                       | 99 (47.1)                                          |
| >60                                       | 120 (55.6)                 | 52 (46.8)                    | >60                                       | 111 (52.9)                                         |
| Sex                                       |                            |                              | Sex                                       |                                                    |
| Male                                      | 138 (63.9)                 | 75 (67.6)                    | Male                                      | 150 (71.4)                                         |
| Female                                    | 78 (36.1)                  | 36 (32.4)                    | Female                                    | 60 (28.6)                                          |
| Tumor differentiation                     |                            |                              | Tumor differentiation                     |                                                    |
| Differentiated                            | 62 (28.7)                  | 31 (27.9)                    | Differentiated                            | 69 (32.9)                                          |
| Undifferentiated                          | 154 (71.3)                 | 80 (72.1)                    | Undifferentiated                          | 141 (67.1)                                         |

|                                  |                  |                       |                                  |                 |
|----------------------------------|------------------|-----------------------|----------------------------------|-----------------|
| Median tumor size, cm<br>(range) | 6.0 (2.5 – 19.0) | 5.2 (2.3 – 17.0)      | Median tumor size, cm<br>(range) | 5.5 (1.5 -18.0) |
| Tumor morphology                 |                  | Tumor morphology      |                                  |                 |
| Borrmann type 3 & 4              | 116 (53.7)       | 70 (63.1)             | Borrmann type 3 & 4              | 125 (59.5)      |
| Others                           | 100 (46.3)       | 41 (36.9)             | Others                           | 85 (40.5)       |
| TNM stage*                       |                  | TNM stage*            |                                  |                 |
| 1                                | 37 (17.2)        | 19 (17.1)             | 1 and 2                          | 85 (40.5)       |
| 2                                | 86 (39.8)        | 34 (30.6)             | 3                                | 94 (44.8)       |
| 3                                | 93 (43.0)        | 58 (52.3)             | 4 (peritoneal metastasis)        | 31 (14.7)       |
| Adjuvant chemotherapy            |                  | Peritoneal metastasis |                                  |                 |
| Yes                              | 158 (73.1)       | 96 (86.5)             | P0/Cy1 <sup>#</sup>              | 16 (51.6)       |
| No                               | 58 (26.9)        | 15 (13.5)             | Gross metastasis                 | 15 (48.4)       |
| Peritoneal recurrence            |                  |                       |                                  |                 |
| Yes                              | 38 (17.6)        | 18 (16.2)             |                                  |                 |
| No                               | 178 (82.4)       | 93 (83.8)             |                                  |                 |

\*TNM stage was based on the American Joint Committee on Cancer 7<sup>th</sup> edition

<sup>#</sup>P0/Cy1 refers to cases with cytology positive gastric cancer without gross metastatic tumor in peritoneal cavity

**Table S3.** Sequence of primers for 12 genes

| No | Gene           | Forward primer        | Reverse primer        | Product length |
|----|----------------|-----------------------|-----------------------|----------------|
| 1  | <i>ZBTB1</i>   | CCCCCTAACAACAGCAGTCC  | ATGACAGGTCCTCCTCGGTT  | 91             |
| 2  | <i>CHCHD3</i>  | TCTCAGCGGTATTCTGGTGC  | TTCTTGGCTTGCTCCAATGC  | 95             |
| 3  | <i>KLHL41</i>  | TGCTACCTTACTGCACTGGC  | TGCTGGGTAACAATGCTGGA  | 62             |
| 4  | <i>POPDC2</i>  | AGCAGGTCTTAACTCTGGCC  | CTCACCCCTCCACAGCATAGG | 50             |
| 5  | <i>LTBP3</i>   | CAGTGTCGGGACAGTTGTCA  | CTCTCCGATGAGCGTCATGT  | 51             |
| 6  | <i>CAVIN2</i>  | ATTTGCCCCACGATGAGGAG  | TCTTCCACCTTTTCCTCGGC  | 55             |
| 7  | <i>STT3B</i>   | GGAGTGATGGTGCGACTGAT  | GCAGACAGCATAACACACGAC | 56             |
| 8  | <i>TXNDC16</i> | GTCCATCTCCAACCTGGGCTT | AAGACGCCAAGCAACCCATT  | 99             |
| 9  | <i>PHYHD1</i>  | AAATTTCTGGTCCCTCCGG   | ATGCTCTTGAAGACGGGGTC  | 81             |
| 10 | <i>KCNJ6</i>   | CTCCATGGATCAGGACGTCG  | TGTGTCTTGGCAGGTCATCC  | 86             |
| 11 | <i>SLITRK6</i> | CCACCATCACGACCTTTCCA  | GTGTGAAGCATCGTCAAGCC  | 59             |
| 12 | <i>LMBR1</i>   | AGATGCCATCGTCAACAGGA  | GCGAGAGTGAACGTGCTCAA  | 51             |

**Table S4.** Random forest importance measures (10 times) in the discovery dataset (GSE15081)

| <b>Gene</b>    | <b>1</b> | <b>2</b> | <b>3</b> | <b>4</b> | <b>5</b> | <b>6</b> | <b>7</b> | <b>8</b> | <b>9</b> | <b>10</b> | <b>Mean</b> |
|----------------|----------|----------|----------|----------|----------|----------|----------|----------|----------|-----------|-------------|
| <i>ZBTB1</i>   | 34.913   | 96.934   | 75.844   | 100.000  | 100.000  | 100.000  | 44.722   | 31.879   | 30.536   | 52.947    | 66.778      |
| <i>CHCHD3</i>  | 24.556   | 90.138   | 18.197   | 23.921   | 57.163   | 25.258   | 0.000    | 19.217   | 16.493   | 0.000     | 27.494      |
| <i>KLHL41</i>  | 56.639   | 59.688   | 100.000  | 57.295   | 64.784   | 66.590   | 62.510   | 26.064   | 100.000  | 21.133    | 61.470      |
| <i>POPDC2</i>  | 59.591   | 51.052   | 55.865   | 44.144   | 46.647   | 70.768   | 87.110   | 53.114   | 14.382   | 100.000   | 58.267      |
| <i>LTBP3</i>   | 100.000  | 0.000    | 0.000    | 5.536    | 23.168   | 30.870   | 50.694   | 13.193   | 15.813   | 26.036    | 26.531      |
| <i>CAVIN2</i>  | 64.559   | 63.449   | 4.298    | 39.151   | 15.280   | 23.372   | 73.616   | 0.000    | 42.331   | 36.087    | 36.214      |
| <i>STT3B</i>   | 32.460   | 7.197    | 21.347   | 10.641   | 34.799   | 17.132   | 39.715   | 17.705   | 0.000    | 41.439    | 22.243      |
| <i>TXNDC16</i> | 42.760   | 96.339   | 60.868   | 63.185   | 27.268   | 39.965   | 50.361   | 96.399   | 9.650    | 47.677    | 53.447      |
| <i>PHYHD1</i>  | 54.510   | 74.704   | 15.025   | 11.784   | 32.599   | 0.000    | 57.617   | 7.228    | 25.625   | 34.781    | 31.387      |
| <i>KCNJ6</i>   | 73.640   | 48.231   | 42.670   | 78.229   | 66.151   | 90.244   | 100.000  | 100.000  | 32.296   | 67.807    | 69.927      |
| <i>SLITRK6</i> | 47.635   | 100.000  | 20.769   | 14.456   | 0.000    | 7.420    | 68.337   | 38.516   | 8.562    | 40.407    | 34.610      |
| <i>LMBR1</i>   | 34.457   | 20.391   | 70.471   | 0.000    | 23.476   | 31.840   | 77.062   | 32.634   | 75.637   | 33.569    | 39.954      |

FigureS1

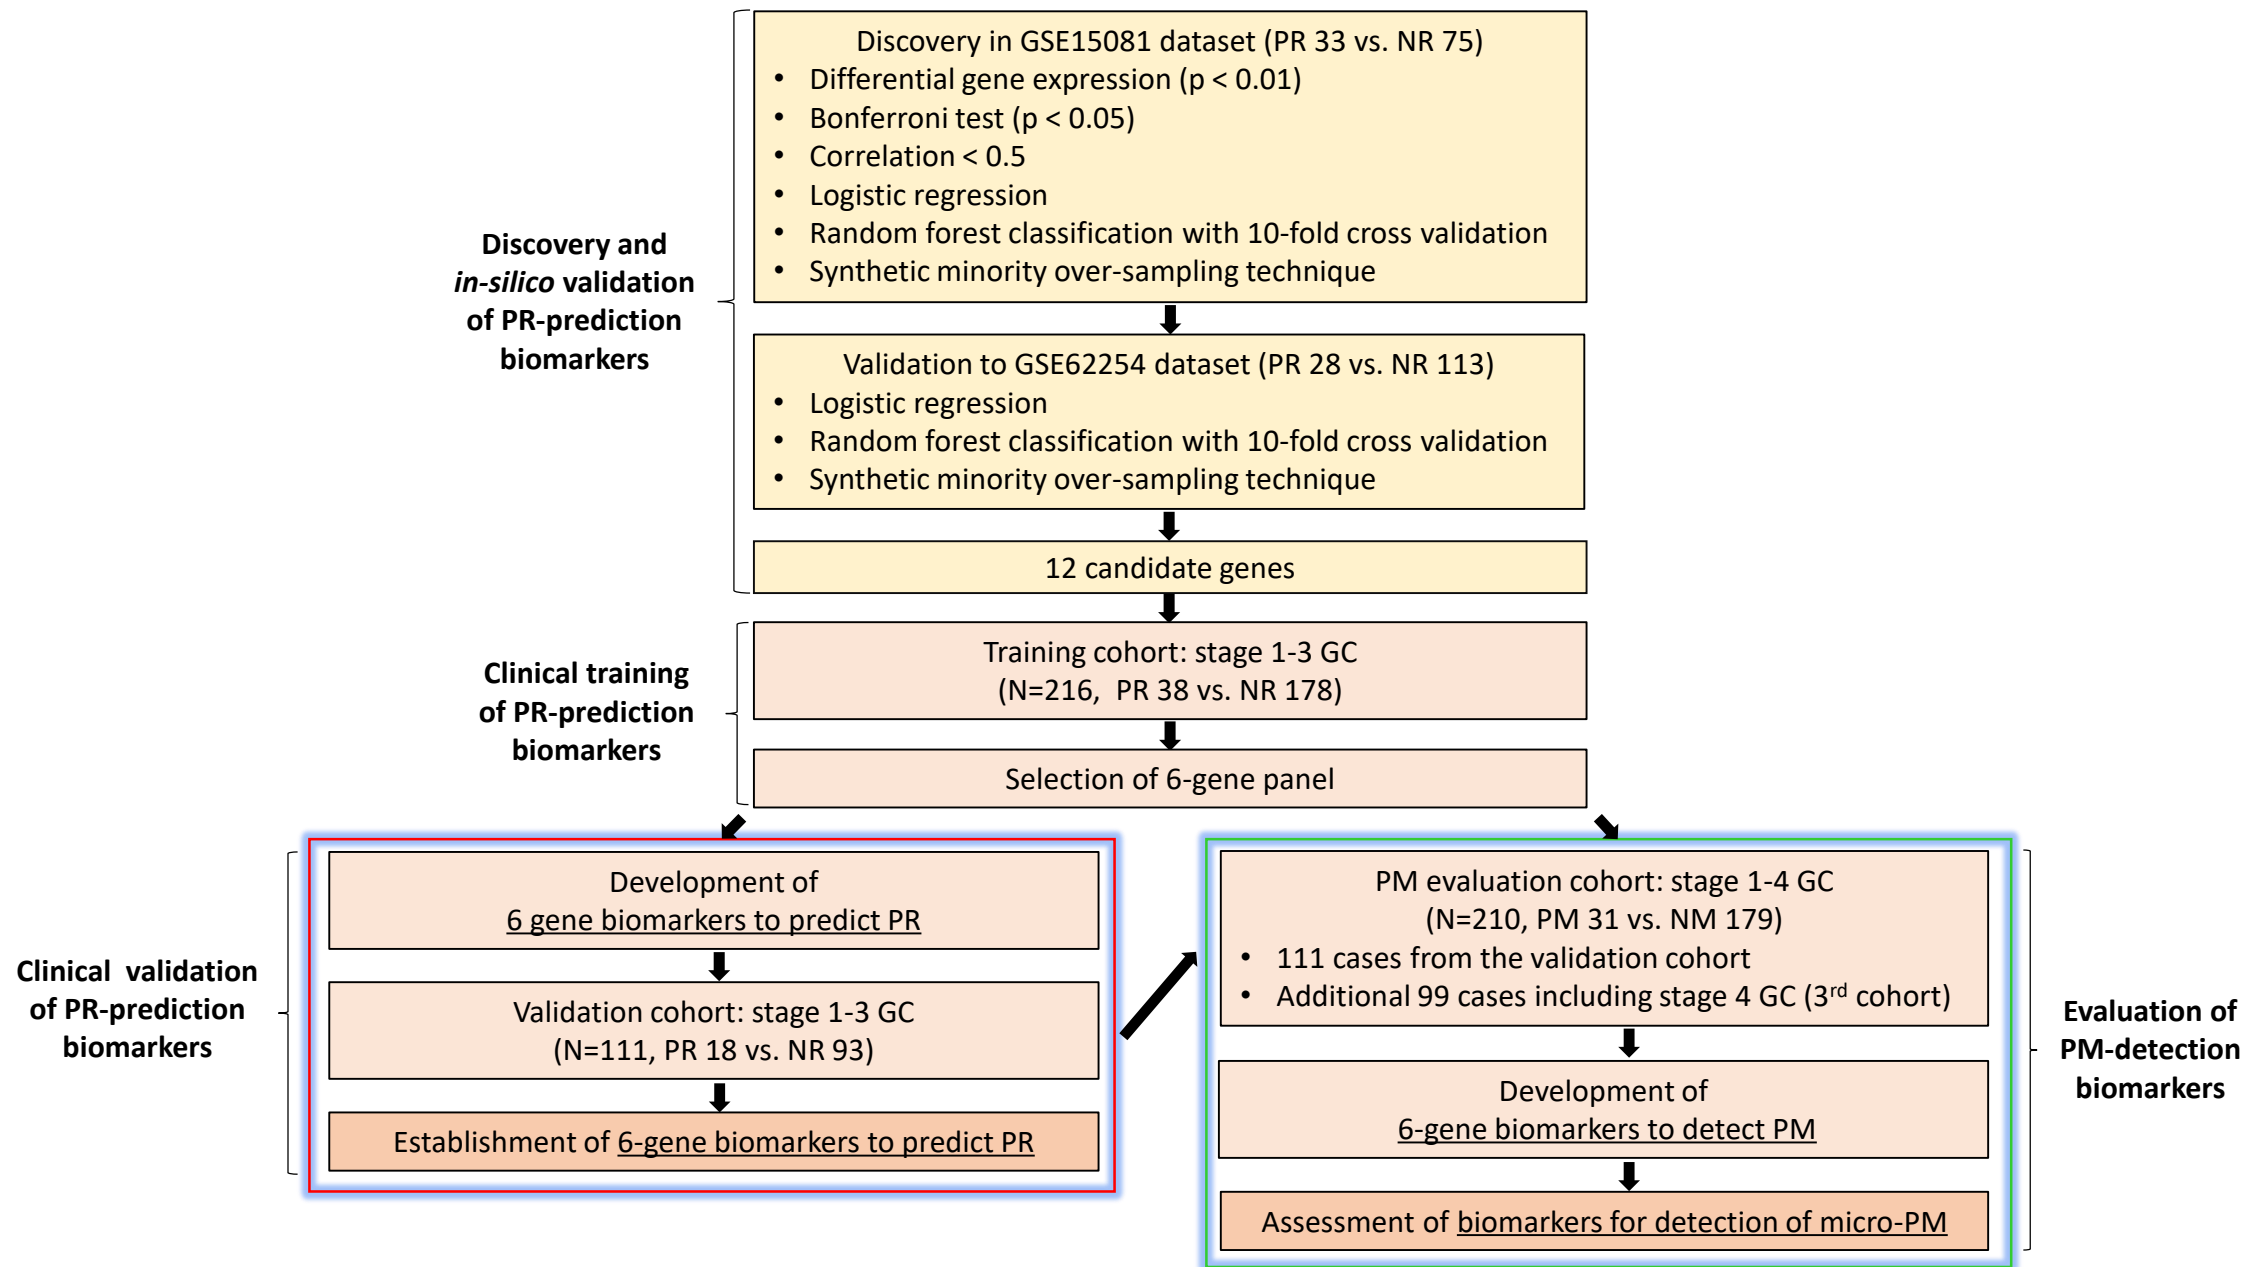

FigureS2

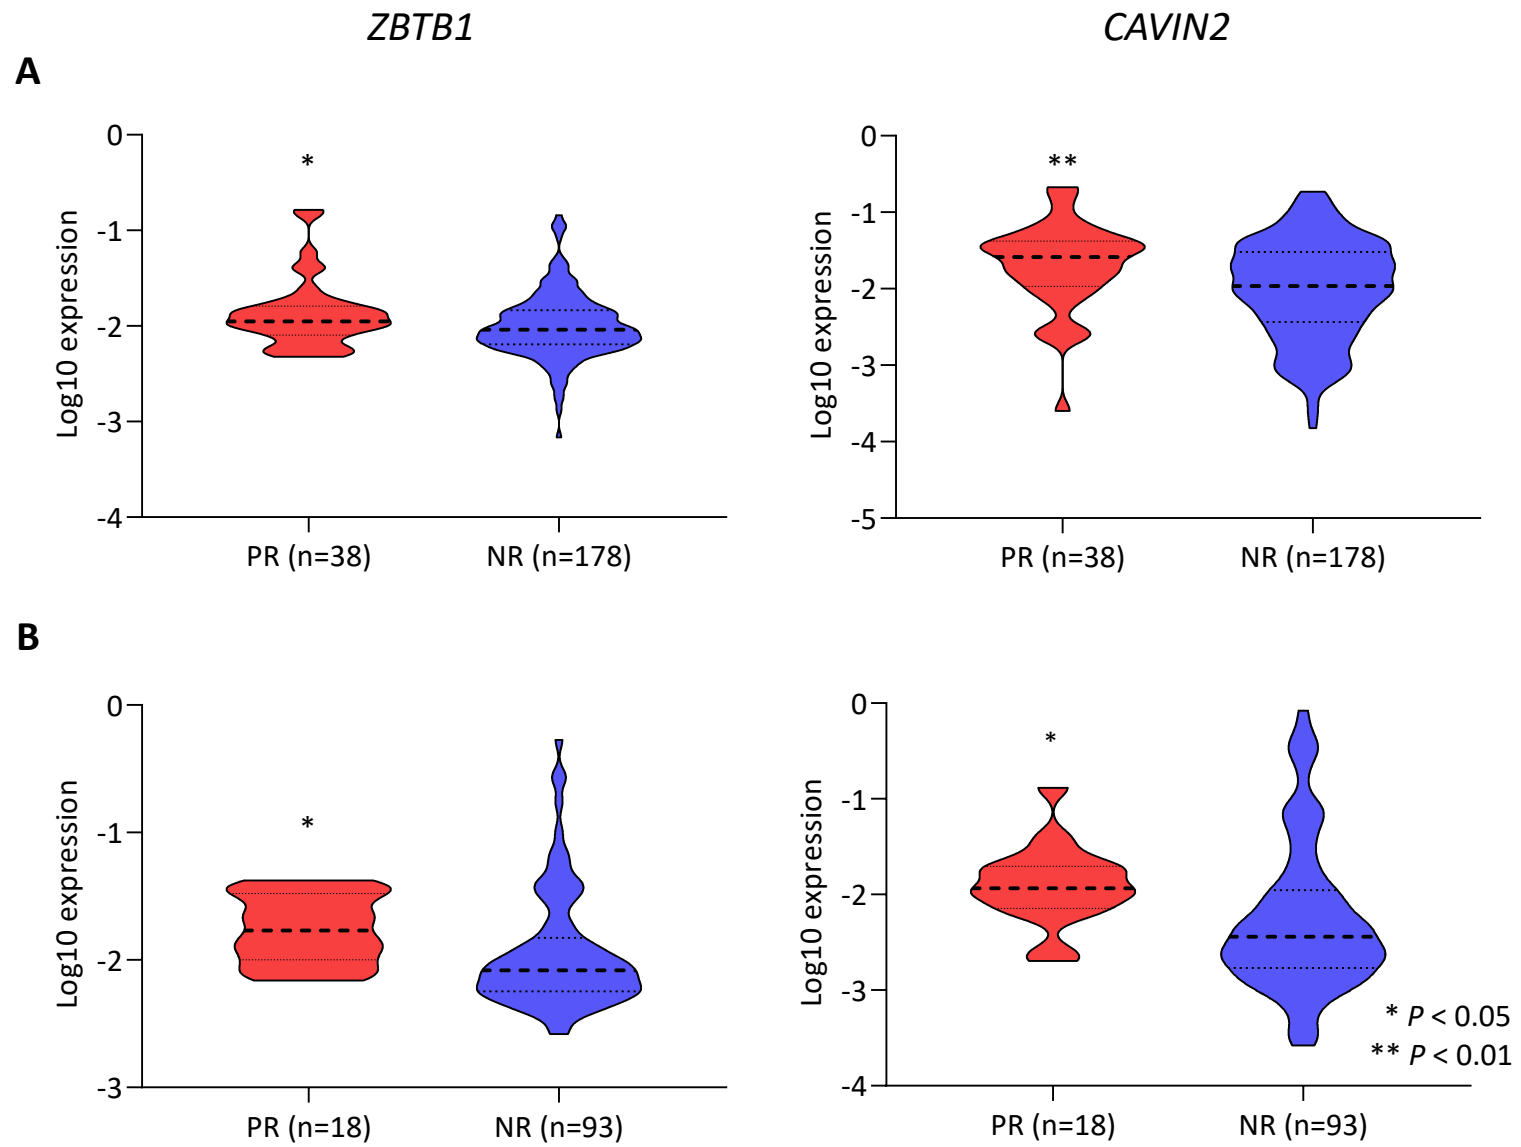

**FigureS3**

**A**

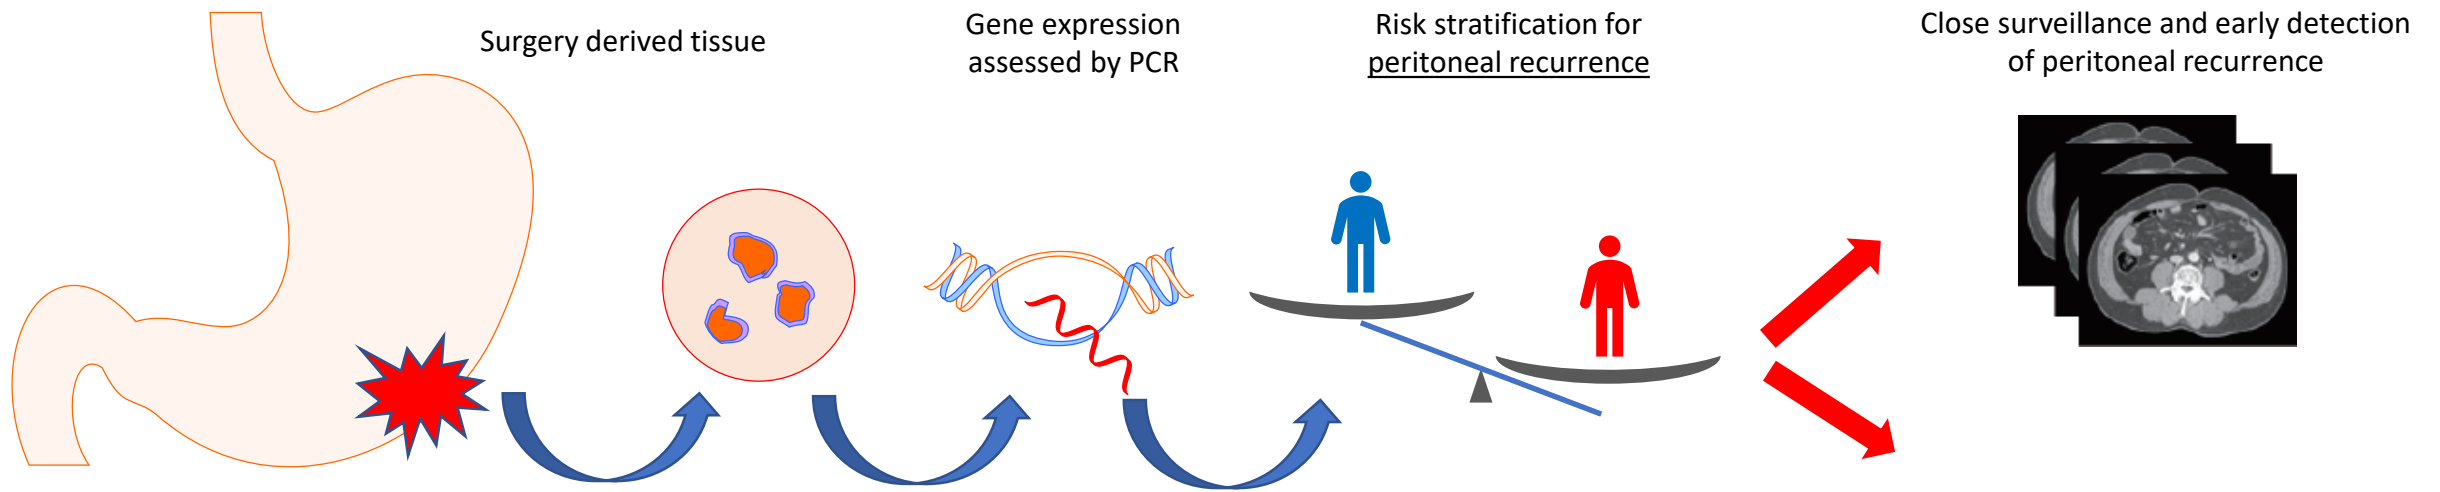

**B**

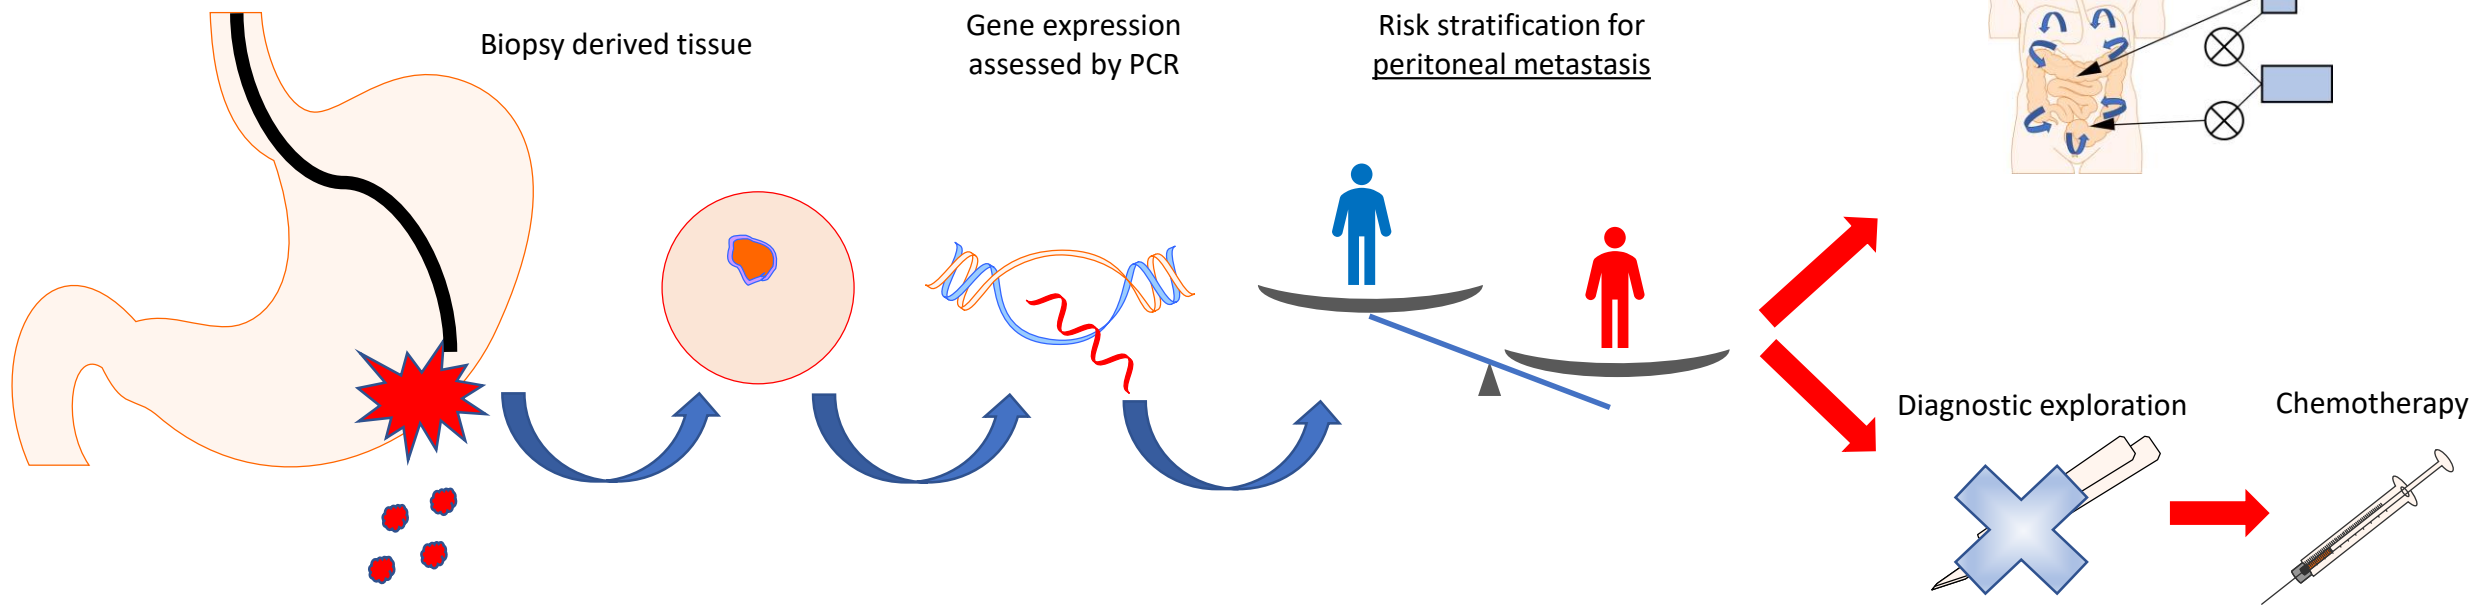

Supplement: NIHMS1673267-supplement-Supplemental_Material_1.pdf [file NIHMS1673267-supplement-Supplemental_Material_1.pdf]
